# Supplementary material
Source: Elsevier journal article supplement (https://www.sciencedirect.com/science/article/pii/S1853002814000032)
Supplement: mmc1 [file S1853002814000032:mmc1.pdf]

## ASOCIACIÓN ENTRE CONSUMO DE YERBA MATE (ILEX PARAGUARIENSIS) Y ENFERMEDAD DE PARKINSON: ESTUDIO CASO-CONTROL

### FICHA DE RECOLECCIÓN DE DATOS

|                         |                                                                                                                                                 |                      |                            |                                      |                                                  |          |                      |
|-------------------------|-------------------------------------------------------------------------------------------------------------------------------------------------|----------------------|----------------------------|--------------------------------------|--------------------------------------------------|----------|----------------------|
| Edad(años)              | <input type="text"/>                                                                                                                            | Control (Si/No)      | <input type="text"/>       | Sexo                                 | <input type="text"/> H <input type="text"/> M    | Ficha N° | <input type="text"/> |
| Raza                    | <input type="text"/> Caucasica <input type="text"/> Negra <input type="text"/> Amerindia <input type="text"/> Otro                              | <input type="text"/> |                            |                                      |                                                  |          |                      |
| Nacionalidad            | <input type="text"/> Argentino <input type="text"/> Otra                                                                                        | <input type="text"/> |                            |                                      |                                                  |          |                      |
| Provincia de residencia | <input type="text"/>                                                                                                                            |                      |                            | Iniciales + ultimos tres numeros DNI | <input type="text"/>                             |          |                      |
| Tipo de residencia      | <input type="text"/> Urbana (mas de 200.000 hab) <input type="text"/> Rural (menos de 200.000 hab)                                              |                      |                            |                                      |                                                  |          |                      |
| Escolaridad             | <input type="text"/> No posee <input type="text"/> Menor a 7 años <input type="text"/> 7-12 años <input type="text"/> Mas de 12 años            |                      |                            |                                      |                                                  |          |                      |
| Estado civil            | <input type="text"/> Soltero <input type="text"/> Casado <input type="text"/> Divorciado <input type="text"/> Viudo/a <input type="text"/> Otro | <input type="text"/> |                            |                                      |                                                  |          |                      |
| Peso                    | <input type="text"/> (Kg)                                                                                                                       | Altura               | <input type="text"/> (Mts) | BMI                                  | <input type="text"/> (Peso/Altura <sup>2</sup> ) |          |                      |
| Institución             | <input type="text"/>                                                                                                                            |                      |                            | No desea participar                  | <input type="text"/>                             |          |                      |

|                                                             |                                                                                                                      |
|-------------------------------------------------------------|----------------------------------------------------------------------------------------------------------------------|
| Enfermedad de Parkinson                                     | <input type="text"/> Si <input type="text"/> No                                                                      |
| Edad de inicio                                              | <input type="text"/> (años)                                                                                          |
| Años de enfermedad                                          | <input type="text"/> (años)                                                                                          |
| Inicio de los sintomas antes de la menopausia (Si es mujer) | <input type="text"/> Si <input type="text"/> No                                                                      |
| Estadio de Hoehn & Yahr                                     | <input type="text"/> 1 <input type="text"/> 2 <input type="text"/> 3 <input type="text"/> 4 <input type="text"/> 5   |
| Esta recibiendo tratamiento médico                          | <input type="text"/> Si <input type="text"/> No                                                                      |
| Antecedentes de Parkinson (Padre/Madre/Hermana/o)           | <input type="text"/> Si <input type="text"/> No                                                                      |
| Ancestros familiares                                        | <input type="text"/> Europeos <input type="text"/> Judíos Ashkenazis <input type="text"/> Otros <input type="text"/> |

|                                     |                                                                                 |
|-------------------------------------|---------------------------------------------------------------------------------|
| Tabaquismo                          | <input type="text"/> Nunca Fumo <input type="text"/> Ex. Tabaquista             |
| Años que no fuma                    | <input type="text"/> < 5 <input type="text"/> 5 a 10 <input type="text"/> >10   |
| Años de fumador                     | <input type="text"/> < 10 <input type="text"/> 10 a 20 <input type="text"/> >20 |
| Cantidad de cig promedio/día        | <input type="text"/> < 10 <input type="text"/> 10 a 20 <input type="text"/> >20 |
| <input type="text"/> Fumador actual |                                                                                 |
| Años de fumador                     | <input type="text"/> < 10 <input type="text"/> 10 a 20 <input type="text"/> >20 |
| Cantidad de cig promedio/día        | <input type="text"/> < 10 <input type="text"/> 10 a 20 <input type="text"/> >20 |

|                                    |                        |                                                |                                                                        |
|------------------------------------|------------------------|------------------------------------------------|------------------------------------------------------------------------|
| <b>Te</b> <input type="checkbox"/> | Nunca tomó             | <input type="checkbox"/>                       | Toma actualmente o ha tomado (1 taza de té son 200 ml aproximadamente) |
| Cantidad de tazas por día          |                        | <input type="checkbox"/> 1 a 3                 | <input type="checkbox"/> Mas de 3                                      |
| Años de consumo                    |                        | <input type="checkbox"/> < 10                  | <input type="checkbox"/> 10 a 20                                       |
| Frecuencia de consumo              |                        | <input type="checkbox"/> < 1 vez al mes        | <input type="checkbox"/> >20                                           |
|                                    |                        | <input type="checkbox"/> 2-4 veces por mes     | <input type="checkbox"/>                                               |
|                                    |                        | <input type="checkbox"/> 4-12 veces por mes    | <input type="checkbox"/>                                               |
|                                    |                        | <input type="checkbox"/> > 12-30 veces por mes | <input type="checkbox"/>                                               |
| <br>                               |                        |                                                |                                                                        |
| <input type="checkbox"/>           | Ex. Coconsumidor de Te |                                                |                                                                        |
| Años que no consume                |                        | <input type="checkbox"/> < 5                   | <input type="checkbox"/> 5 a 10                                        |
| Años que ha consumido              |                        | <input type="checkbox"/> < 10                  | <input type="checkbox"/> 10 a 20                                       |
| Frecuencia de consumo              |                        | <input type="checkbox"/> < 1 vez al mes        | <input type="checkbox"/> >10                                           |
|                                    |                        | <input type="checkbox"/> 2-4 veces por mes     | <input type="checkbox"/> >20                                           |
|                                    |                        | <input type="checkbox"/> 4-12 veces por mes    | <input type="checkbox"/>                                               |
|                                    |                        | <input type="checkbox"/> > 12-30 veces por mes | <input type="checkbox"/>                                               |

|                                      |                          |                                                |                                   |
|--------------------------------------|--------------------------|------------------------------------------------|-----------------------------------|
| <b>Café</b> <input type="checkbox"/> | Nunca tomó               | <input type="checkbox"/>                       | Toma actualmente o ha tomado      |
| Cantidad de tazas por día            |                          | <input type="checkbox"/> 1 a 3                 | <input type="checkbox"/> Mas de 3 |
| Años de consumo                      |                          | <input type="checkbox"/> < 10                  | <input type="checkbox"/> 10 a 20  |
| Frecuencia de consumo                |                          | <input type="checkbox"/> < 1 vez al mes        | <input type="checkbox"/> >20      |
|                                      |                          | <input type="checkbox"/> 2-4 veces por mes     | <input type="checkbox"/>          |
|                                      |                          | <input type="checkbox"/> 4-12 veces por mes    | <input type="checkbox"/>          |
|                                      |                          | <input type="checkbox"/> > 12-30 veces por mes | <input type="checkbox"/>          |
| <br>                                 |                          |                                                |                                   |
| <input type="checkbox"/>             | Ex. Coconsumidor de Cafe |                                                |                                   |
| Años que no consume                  |                          | <input type="checkbox"/> < 5                   | <input type="checkbox"/> 5 a 10   |
| Años que ha consumido                |                          | <input type="checkbox"/> < 10                  | <input type="checkbox"/> 10 a 20  |
| Frecuencia de consumo                |                          | <input type="checkbox"/> < 1 vez al mes        | <input type="checkbox"/> >10      |
|                                      |                          | <input type="checkbox"/> 2-4 veces por mes     | <input type="checkbox"/> >20      |
|                                      |                          | <input type="checkbox"/> 4-12 veces por mes    | <input type="checkbox"/>          |
|                                      |                          | <input type="checkbox"/> > 12-30 veces por mes | <input type="checkbox"/>          |

|                                      |                                                          |                                                |                                                                                |
|--------------------------------------|----------------------------------------------------------|------------------------------------------------|--------------------------------------------------------------------------------|
| <b>Mate</b> <input type="checkbox"/> | Nunca tomó                                               | <input type="checkbox"/>                       | Toma actualmente o ha tomado ( <u>Mate Cocido</u> ) - 1 taza son 200 ml aprox. |
| Cantidad de tazas por día            |                                                          | <input type="checkbox"/> 1 a 3                 | <input type="checkbox"/> Mas de 3                                              |
| Años de consumo                      |                                                          | <input type="checkbox"/> < 10                  | <input type="checkbox"/> 10 a 20                                               |
| Frecuencia de consumo                |                                                          | <input type="checkbox"/> < 1 vez al mes        | <input type="checkbox"/> >20                                                   |
|                                      |                                                          | <input type="checkbox"/> 2-4 veces por mes     | <input type="checkbox"/>                                                       |
|                                      |                                                          | <input type="checkbox"/> 4-12 veces por mes    | <input type="checkbox"/>                                                       |
|                                      |                                                          | <input type="checkbox"/> > 12-30 veces por mes | <input type="checkbox"/>                                                       |
| <br>                                 |                                                          |                                                |                                                                                |
| <input type="checkbox"/>             | Toma actualmente o ha tomado ( <u>Mate en bombilla</u> ) |                                                |                                                                                |
| Cantidad de (litros) por día         |                                                          | <input type="checkbox"/> < 0,5 a 1             | <input type="checkbox"/> 0,5 a 1                                               |
| Años de consumo                      |                                                          | <input type="checkbox"/> < 10                  | <input type="checkbox"/> 10 a 20                                               |
| Frecuencia de consumo                |                                                          | <input type="checkbox"/> < 1 vez al mes        | <input type="checkbox"/> > 1                                                   |
|                                      |                                                          | <input type="checkbox"/> 2-4 veces por mes     | <input type="checkbox"/> >20                                                   |
|                                      |                                                          | <input type="checkbox"/> 4-12 veces por mes    | <input type="checkbox"/>                                                       |
|                                      |                                                          | <input type="checkbox"/> > 12-30 veces por mes | <input type="checkbox"/>                                                       |
| <br>                                 |                                                          |                                                |                                                                                |
| <input type="checkbox"/>             | Ex. Coconsumidor de Mate                                 |                                                |                                                                                |
| Años que no consume                  |                                                          | <input type="checkbox"/> < 5                   | <input type="checkbox"/> 5 a 10                                                |
| Años que ha consumido                |                                                          | <input type="checkbox"/> < 10                  | <input type="checkbox"/> 10 a 20                                               |
| Frecuencia de consumo                |                                                          | <input type="checkbox"/> < 1 vez al mes        | <input type="checkbox"/> >10                                                   |
|                                      |                                                          | <input type="checkbox"/> 2-4 veces por mes     | <input type="checkbox"/> >20                                                   |
|                                      |                                                          | <input type="checkbox"/> 4-12 veces por mes    | <input type="checkbox"/>                                                       |
|                                      |                                                          | <input type="checkbox"/> > 12-30 veces por mes | <input type="checkbox"/>                                                       |

Alcohol

Nunca tomó

Toma actualmente o ha tomado

Tipo de bebida

Vino blanco

Whisky

Vodka

Cerveza

Vino tinto

Ginebra

Champagne

Tequila

Otro

Cantidad de vasos por día  
(1 vaso son 100 ml aproximadamente)

1 a 3

1 a 3

Mas de 3

Años de consumo

< 10

10 a 20

>20

Frecuencia de consumo

< 1 vez al mes

2-4 veces por mes

4-12 veces por mes

> 12-30 veces por mes

Ex. Coconsumidor de Alcohol

Años que no consume

< 5

5 a 10

>10

Años que ha consumido

< 10

10 a 20

>20

Frecuencia de consumo

< 1 vez al mes

2-4 veces por mes

4-12 veces por mes

> 12-30 veces por mes
